# Supplementary material
Source: PubMed Central journal article supplement (PMC5704466)
Supplement: 10.1074_C117.806067_jbc.C117.806067-1.pdf [file 10.1074_C117.806067_jbc.C117.806067-1.pdf]

# Supplementary Data

## How activating mutations affect MEK1 regulation and function

**Authors:** Granton A. Jindal<sup>1,2,3,†</sup>, Yogesh Goyal<sup>1,2,3,†</sup>, John M. Humphreys<sup>4</sup>, Eyan Yeung<sup>2,3</sup>, Kaijia Tian<sup>1,2</sup>, Victoria L. Patterson<sup>2,3</sup>, Haixia He<sup>4</sup>, Rebecca D. Burdine<sup>3</sup>, Elizabeth J. Goldsmith<sup>4,\*</sup>, Stanislav Y. Shvartsman<sup>1,2,3,\*</sup>

**Affiliations:**

<sup>1</sup>Department of Chemical and Biological Engineering, Princeton University, Princeton, NJ 08544.

<sup>2</sup>Lewis-Sigler Institute for Integrative Genomics, Princeton University, Princeton, NJ 08544.

<sup>3</sup>Department of Molecular Biology, Princeton University, Princeton, NJ 08544.

<sup>4</sup>Department of Biophysics, The University of Texas Southwestern Medical Center at Dallas, 5323 Harry Hines Blvd, Dallas, TX 75390-8816.

†These authors contributed equally to the work

\*To whom correspondence should be addressed: [elizabeth.goldsmith@utsouthwestern.edu](mailto:elizabeth.goldsmith@utsouthwestern.edu), [stas@princeton.edu](mailto:stas@princeton.edu).

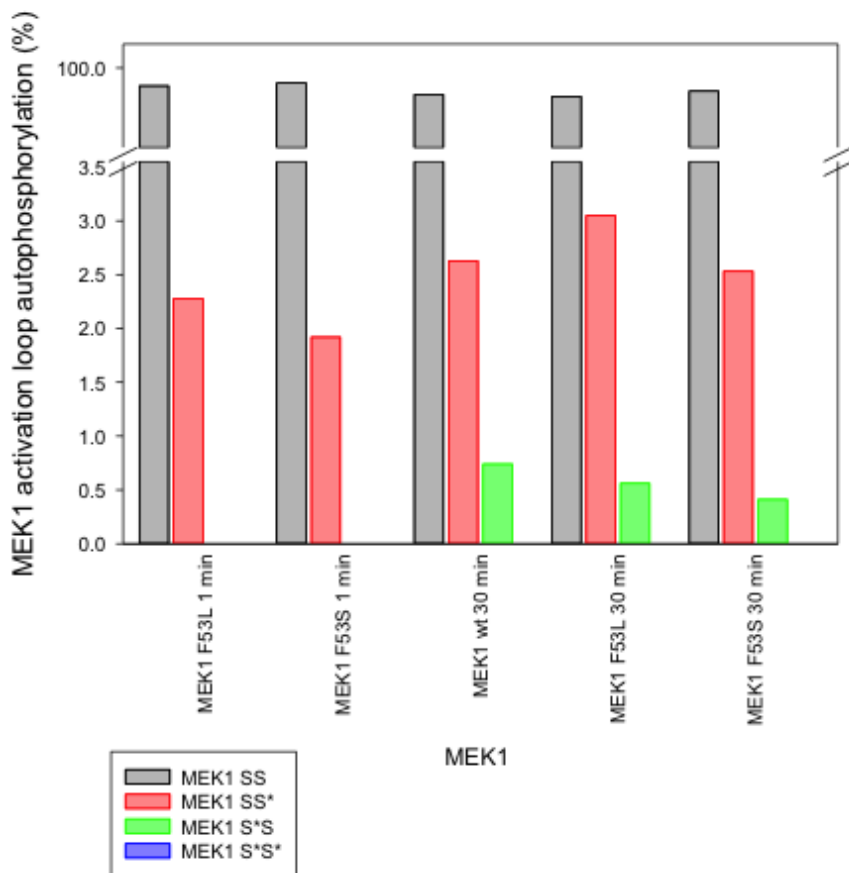

**Figure S1. The activity of MEK1/F53L and MEK1/F53S does not involve autophosphorylation.** Incubation of either WT-MEK1, MEK1/F53S, or MEK1/F53L with ERK2/K52M produces only small amounts of MEK1 SS\*, as observed by mass spectrometry.

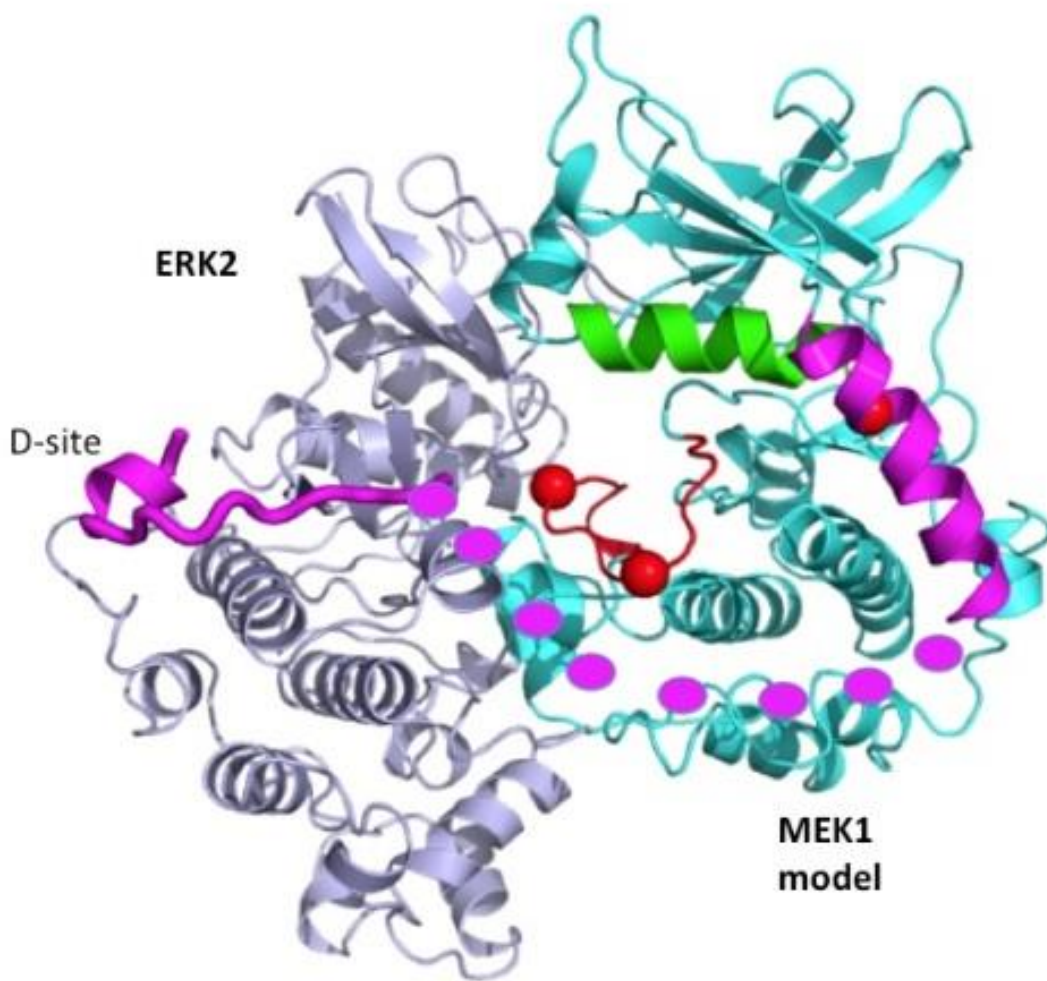

**Figure S2. A model for the complex between MEK1 and ERK2.** The model was constructed by using pdb file 2GPH (ERK2 with a docking peptide) (gray) and PKA (cyan) as a surrogate for active MEK1. These molecules were superimposed on a complex between p38 MAP kinase and MK2 (PDB file 4tyh). This is a good model to show how docking between the N-terminus of MEK1 and the ERK2 D-site might occur, but not a good model for active site interactions. Magenta dots show how the N-terminus of MEK1 (which is longer than PKA) might reach around to the docking site.

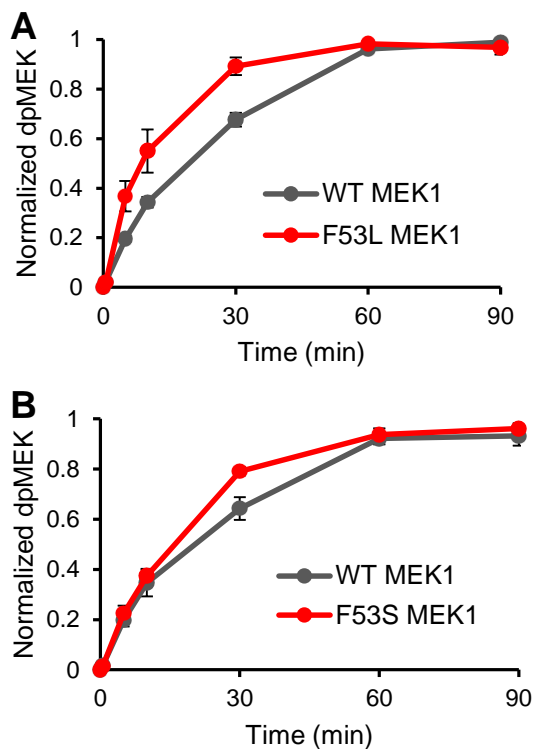

**Figure S3. Activating MEK mutations enhance the rate of MEK1 phosphorylation by Raf. (A, B)** Phosphorylation of MEK1/F53L and MEK1/F53S occurs faster than phosphorylation of wild-type MEK1. The reaction was run at a Raf:MEK ratio of 1:50. The normalized dpMEK is an average of 3 experimental replicates. Error bars, s.e.m.

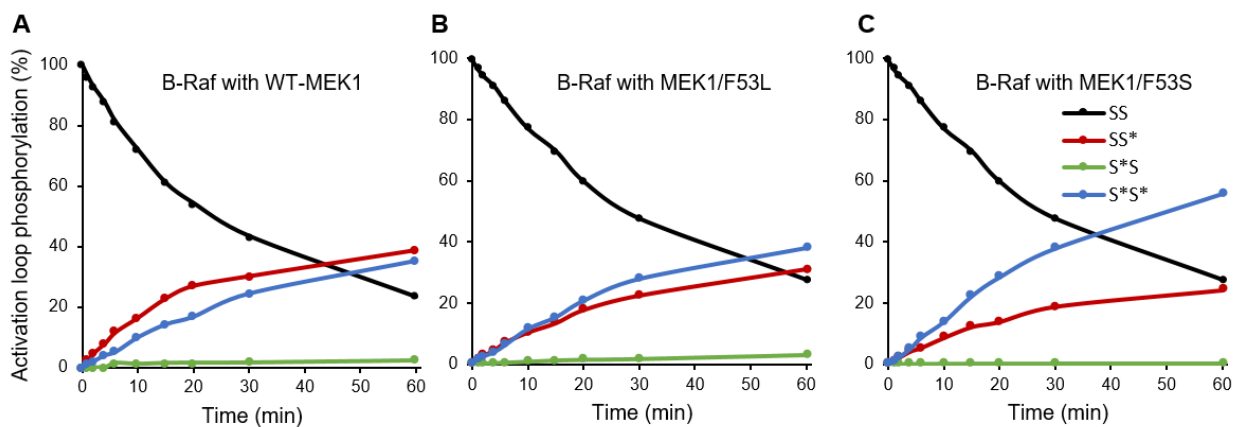

**Figure S4. Order of phosphorylation of MEK1/F53S and MEK1/F53L by B-Raf.** Activation loop phosphorylation by B-Raf of the MEK1 species indicated was followed over time using LC-MS. **(A)** B-Raf phosphorylates MEK1 through the intermediate MEK1/SS\*. **(B, C)** B-Raf phosphorylated the MEK1/F53 mutants with an order and mechanism like wild-type.

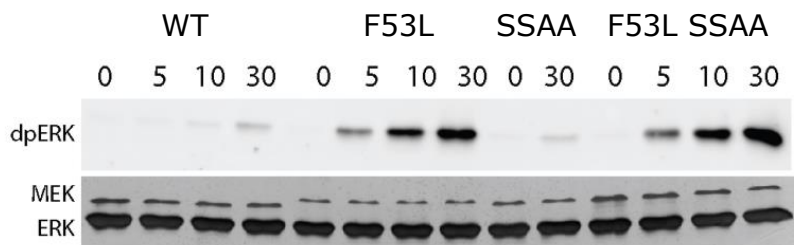

**Figure S5. Alanine substitutions at S218 and S222 do not affect MEK1/F53L activity.** Alanine substitutions at S218 and S222 do not affect MEK1/F53L intrinsic activity, which is much higher than wild-type MEK1. A western blot for comparing ERK T\*Y\* formed by incubating wild-type ERK2 with unphosphorylated wild-type MEK1, wild-type MEK1 SSAA, MEK1/F53L, and MEK1/F53L SSAA. MEK1 (2  $\mu$ M) and ERK2 (10  $\mu$ M) at a ratio of 1:5.

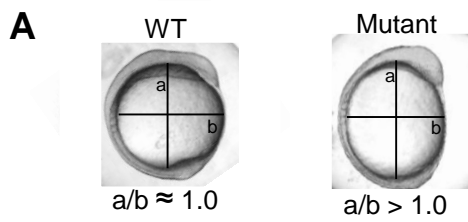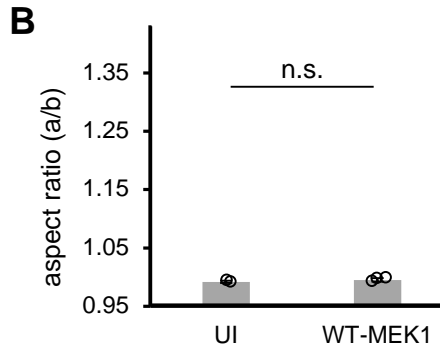

**Figure S6. Overexpression of tagged MEK1 does not affect oval shape of the zebrafish embryo. (A)** Images of a wild-type embryo and an embryo injected with a MEK mutant at 11 hours post fertilization with major (a) and minor (b) axes marked. The degree of oval shape of the embryo is measured as  $a/b$ . **(B)** The tagged WT-MEK1 mRNA upon injection does not lead to an oval embryo phenotype.  $N_{UI} = 57$  (2 biological replicates),  $N_{WT-MEK1} = 94$  (3 biological replicates). Pairwise Student's t-test (two-sided, homoscedastic) was performed to compare between groups: n.s. not significant. Error bars, s.d.

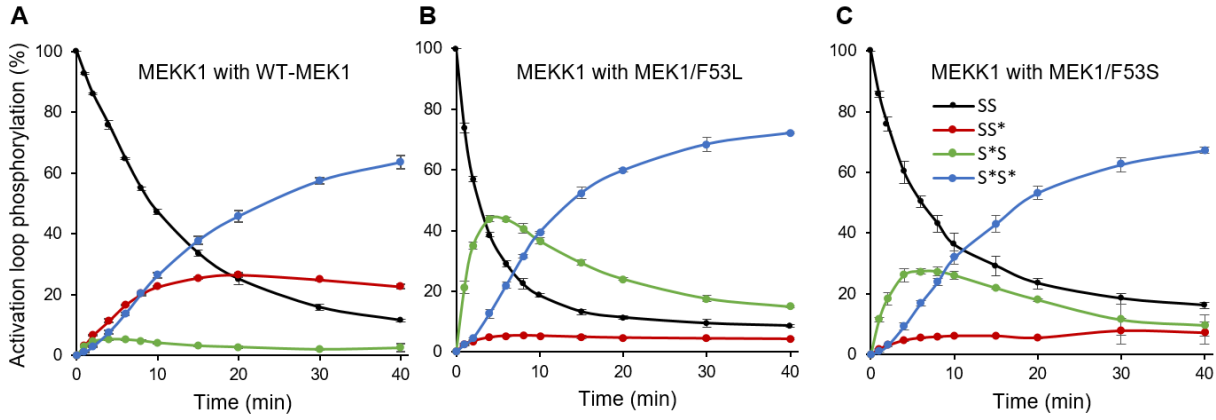

**Figure S7. Order of phosphorylation of MEK1/F53S and MEK1/F53L by MEKK1.** Activation loop phosphorylation by MEKK1 of the MEK1 species indicated was followed over time using LC-MS. To generate progress curves on similar scales as to Figure S4, 60-fold more MEKK1 than B-Raf was used with equal concentrations of MEK1. **(A)** MEKK1 phosphorylates MEK1 through the intermediate MEK1/SS\*. **(B, C)** MEKK1 phosphorylation of the MEK1/F53 mutants showed a reversal of the phosphointermediate (MEK1/S\*S (green) instead of MEK1/SS\* (red)) in comparison to B-Raf.
